# Supplementary material for: In situ exsolution of Ag from AgBiS2 nanocrystal anode boosting high-performance potassium-ion batteries
Source: Royal Society of Chemistry journal article supplement (doi:10.1039/d0ta03964k), 2020-01-01
Supplement: d0ta03964k1.pdf [file d0ta03964k1.pdf]

## ***In-Situ* Exsolution of Ag from AgBiS<sub>2</sub> Nanocrystals Anode Boosting High-Performance Potassium-Ion Batteries**

*Xiaoru Ren*‡, *Dongxu Yu*‡, *Long Yuan*, *Yaocai Bai*, *Keke Huang* *Jinghai Liu*, and *Shouhua Feng*\*

### **Synthesis of Bi<sub>2</sub>S<sub>3</sub> Nanorods**

Typically, 1.0 mmol Bi(NO<sub>3</sub>)<sub>3</sub> was loaded into a 100 mL three-neck flask fitted with a reflux condenser containing 1 mL OAm, 1 mL OA and 8mL ODE. The mixture was heated to 115 °C purifying alternatively in vacuum and argon atmosphere for three times to eliminate adventitious water and dissolved oxygen. Afterwards, the system was heated up to the transition temperature of 170 °C and followed by injection 3 mL N,N'-diphenylthiourea/diphenyl ether solution at the dissolving temperature of 145 °C via syringe with the color of the solution instantly turned black. The following step are the same as the synthesis process of AgBiS<sub>2</sub> NCs.

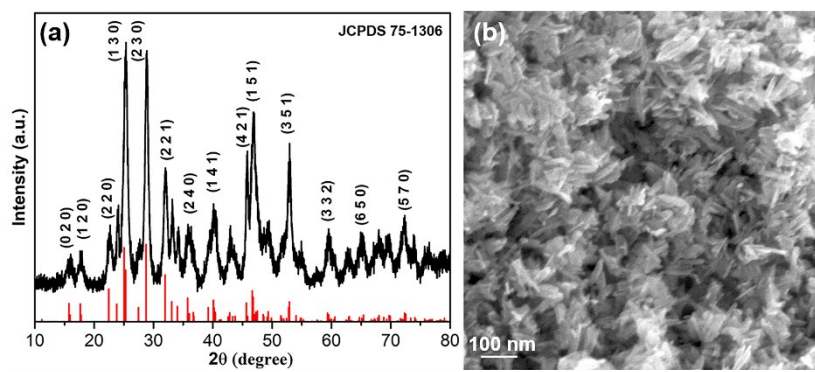

**Figure S1.** (a, b) XRD pattern and SEM image of Bi<sub>2</sub>S<sub>3</sub> NCs.

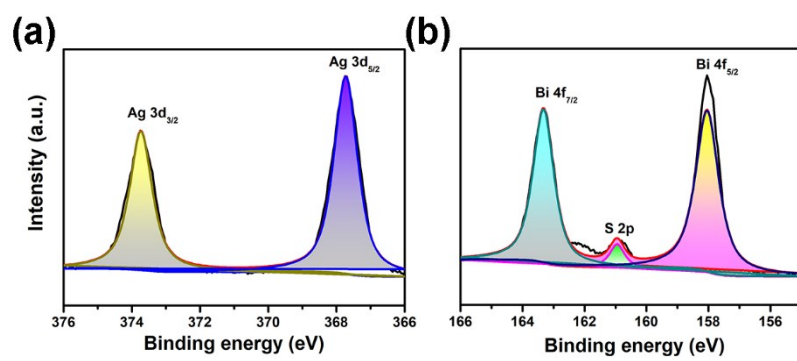

**Figure S2.** (a, b) XPS spectra of Ag, Bi and S.

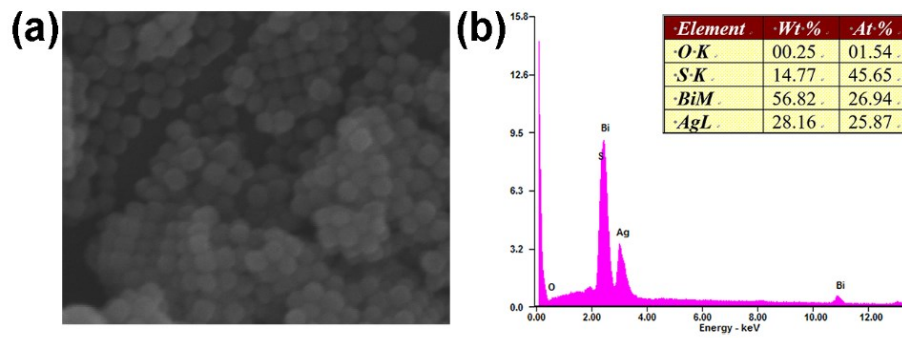

**Figure S3.** (a, b) The SEM image EDX spectrum of AgBiS<sub>2</sub> NCs.

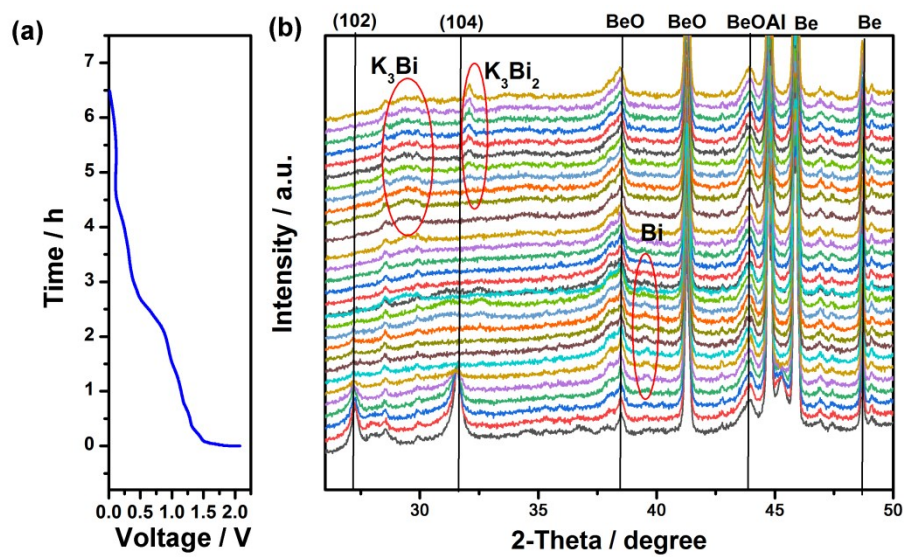

**Figure S4.** (a) The 1<sup>st</sup> discharge profile of  $AgBiS_2$  at a current density of  $0.5 \text{ A g}^{-1}$  between 0.01 and 3 V. (b) The voltage profile against *in-situ* XRD patterns in the selected 2-theta regions.

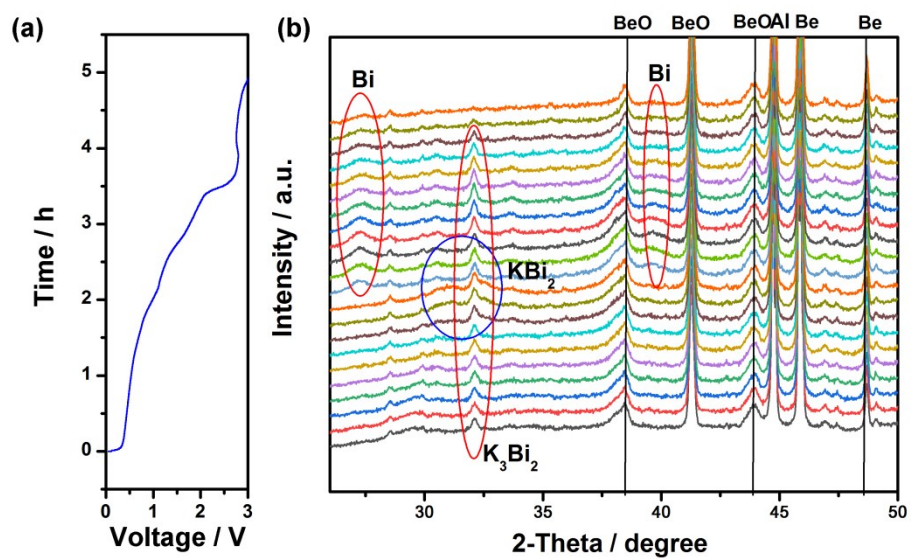

**Figure S5.** (a) The 1<sup>st</sup> charge profile of AgBiS<sub>2</sub> at a current density of 0.5 A g<sup>-1</sup> between 0.01 and 3 V. (b) The voltage profile against *in-situ* XRD patterns in the selected 2-theta regions.

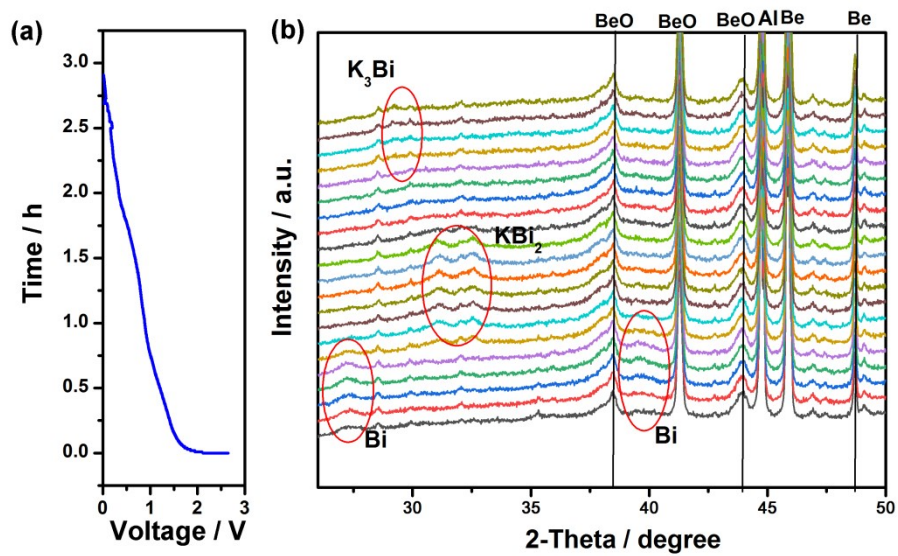

**Figure S6.** (a) The 2<sup>nd</sup> discharge profile of  $AgBiS_2$  at a current density of  $0.5 \text{ A g}^{-1}$  between 0.01 and 3 V. (b) The voltage profile against *in-situ* XRD patterns in the selected 2-theta regions.

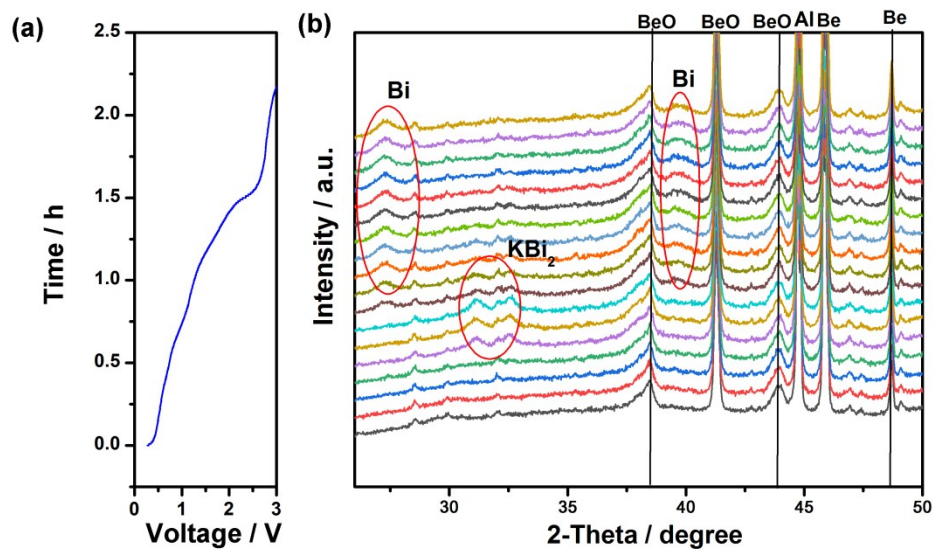

**Figure S7.** (a) The 2<sup>nd</sup> charge profile of AgBiS<sub>2</sub> at a current density of 0.5 A g<sup>-1</sup> between 0.01 and 3 V. (b) The voltage profile against *in-situ* XRD patterns in the selected 2-theta regions.



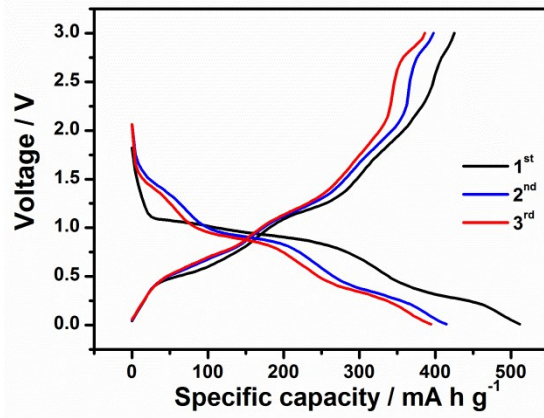

**Figure S8.** Galvanostatic discharge-charge curves of AgBiS<sub>2</sub> nanorods at 0.5 A g<sup>-1</sup> using Al foil as current collector

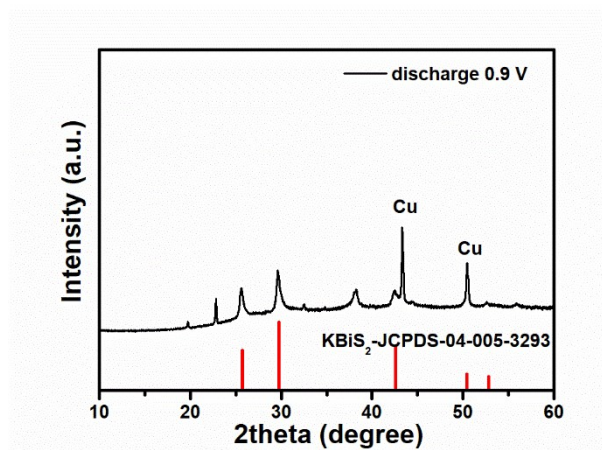

**Figure S9.** (a) the XRD pattern of KBiS<sub>2</sub>.

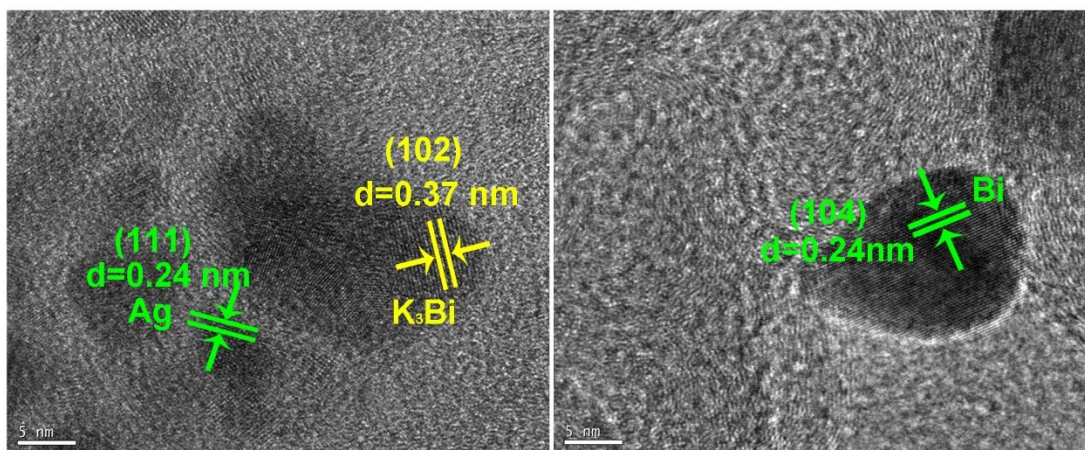

**Figure S10** (a, b). HRTEM images of AgBiS<sub>2</sub> electrode after being discharged to 0.01 V and charged to 3.0 V.

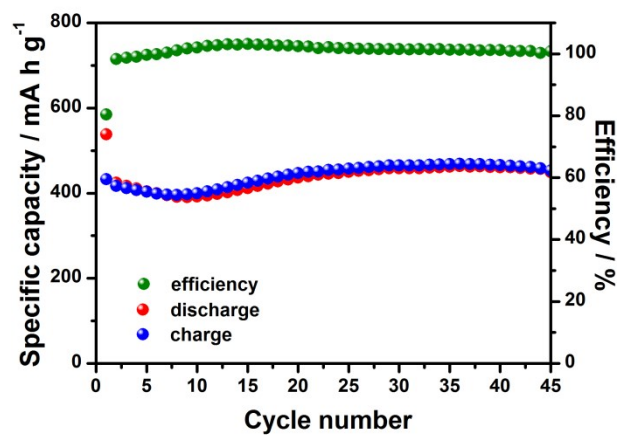

**Figure S11.** Cycling performance of AgBiS<sub>2</sub> nano-octahedrons at 0.5 A g<sup>-1</sup>.

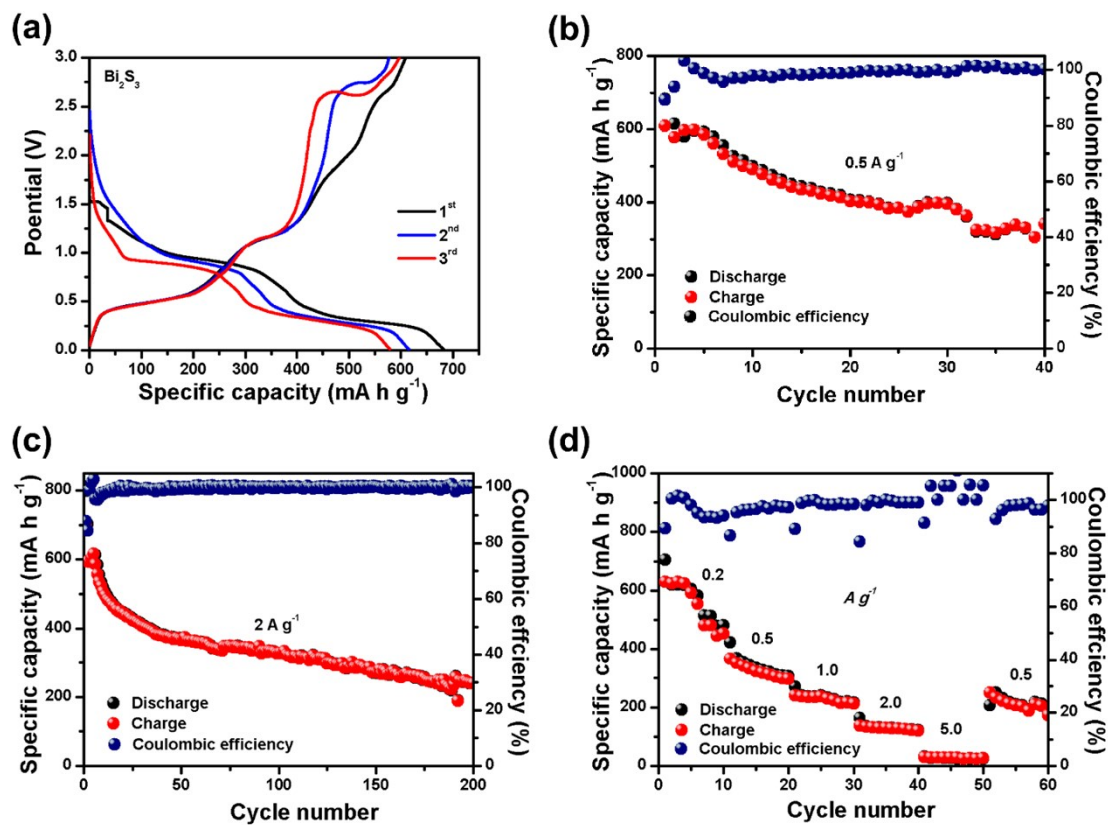

**Figure S12.** (a) the GCD curves of the  $\text{Bi}_2\text{S}_3$ ; (b) the cycling performance at the current rate of 0.5  $\text{A g}^{-1}$ ; (c) the cycling performance at the current rate of 2  $\text{A g}^{-1}$ ; (d) the rate performance of  $\text{Bi}_2\text{S}_3$  at various current rates.

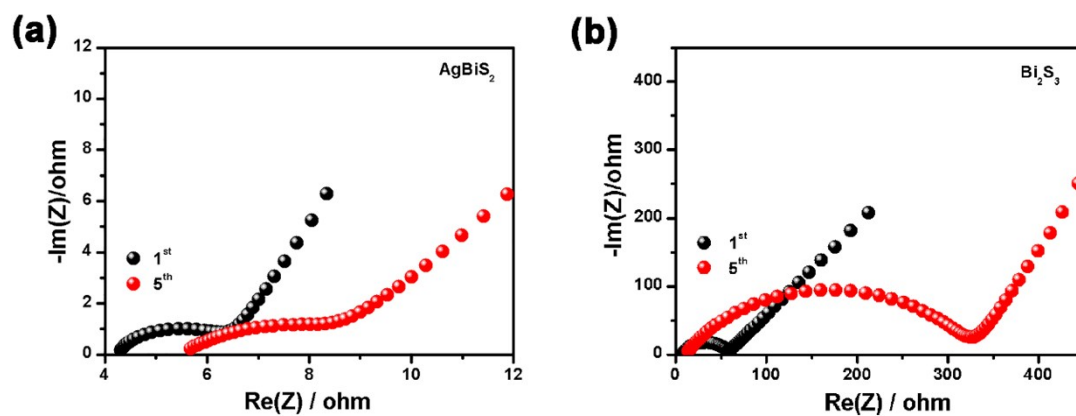

Figure S13. The EIS of different cycles (a)  $\text{AgBiS}_2$ ; (b)  $\text{Bi}_2\text{S}_3$ .

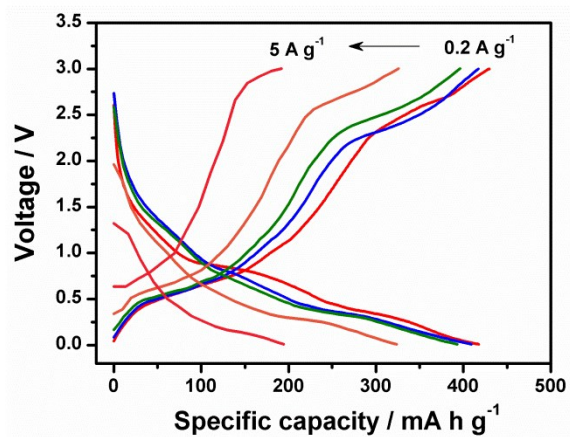

**Figure S14.** Galvanostatic discharge-charge curves of AgBiS<sub>2</sub> nanocubes at various current densities from 0.2 to 5 A g<sup>-1</sup>.

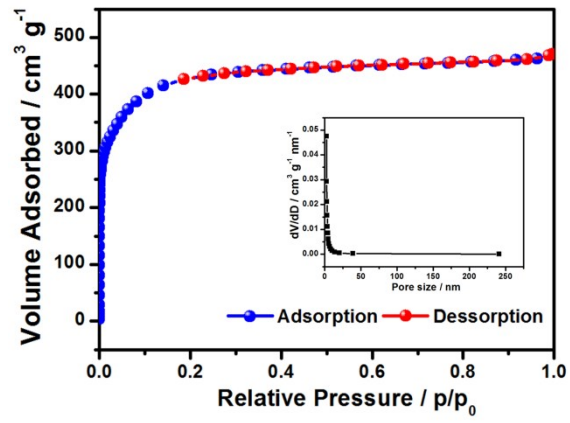

Figure S15. N<sub>2</sub> adsorption-desorption isotherms of AC



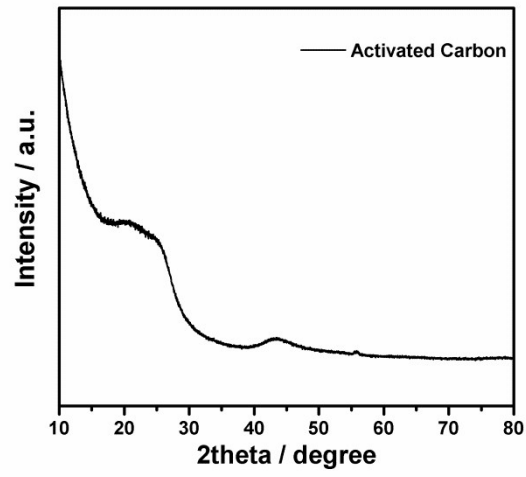

**Figure S16.** XRD pattern of Activated Carbon (AC)

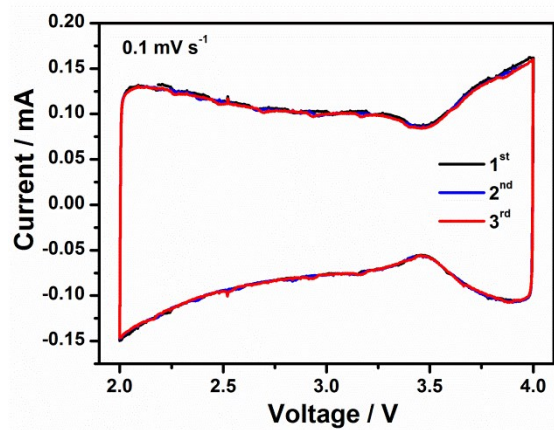

Figure S17. CV curves of AC at 0.1 mV/s

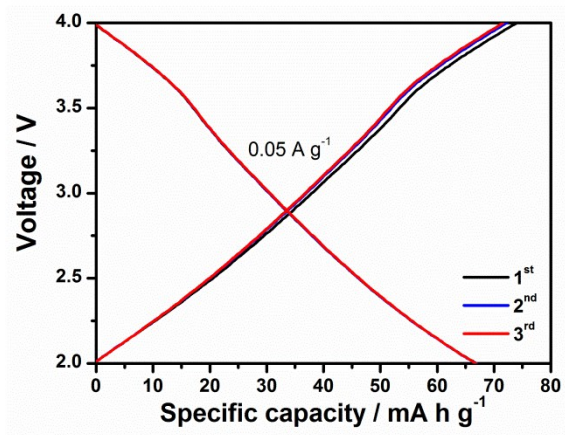

**Figure S18.** Charge-discharge profiles of AC at 0.05 A/g between 2.0 -4.0 V;

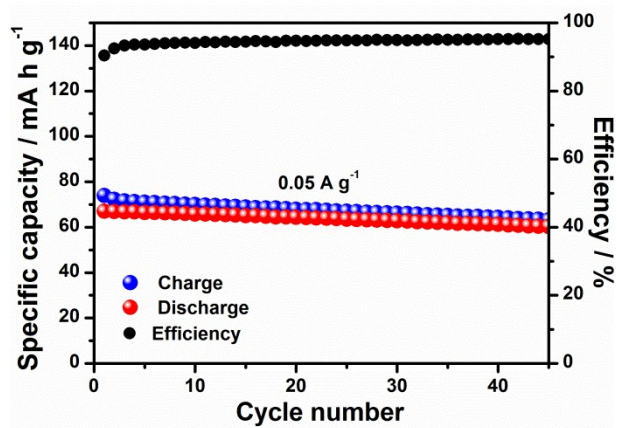

Figure S19. Cycling performance of AC at 0.05 A/g

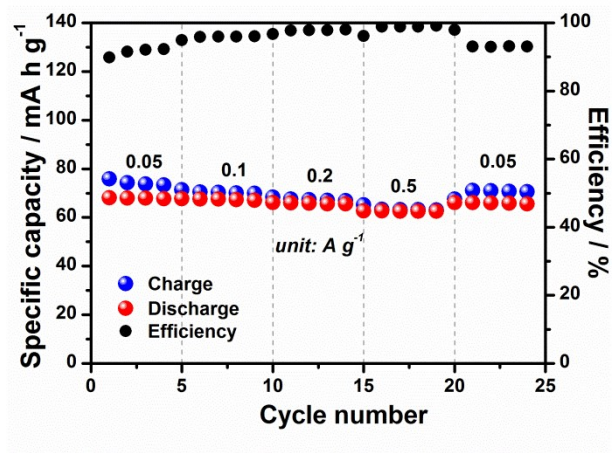

Figure S20. Rate capacity of AC

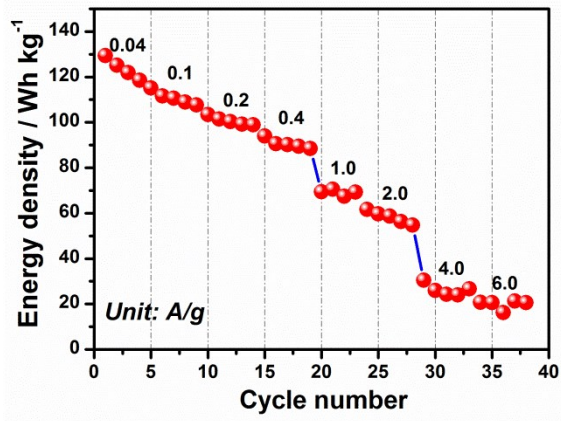

Figure S21. Rate performance of AC//AgBiS<sub>2</sub> hybrid capacitor at various current densities

**Table S1.** Comparison of energy density for various KIHCs

| Active Material                                                          | Energy Density (Wh kg <sup>-1</sup> ) | Power Density (W kg <sup>-1</sup> ) | Year      |
|--------------------------------------------------------------------------|---------------------------------------|-------------------------------------|-----------|
| (N, S)-3DHPC//AC                                                         | 130.6                                 | 210                                 | 2020      |
| CNSs//AC                                                                 | 149.0                                 | 210                                 | 2019      |
| NCHS//WS <sub>2</sub> @NCNs                                              | 103.4                                 | 235                                 | 2019      |
| Bi//K <sub>0.72</sub> Fe[Fe(CN) <sub>6</sub> ]                           | 108.1                                 | 566                                 | 2018      |
| K <sub>2</sub> Ti <sub>6</sub> O <sub>13</sub> //NGC                     | 58.2                                  | ~160                                | 2018      |
| Ca <sub>0.5</sub> Ti <sub>2</sub> (PO <sub>4</sub> ) <sub>3</sub> @C//AC | 80                                    | 32                                  | 2018      |
| K <sub>2</sub> TP//AC                                                    | 46                                    | 101                                 | 2018      |
| AgBiS <sub>2</sub> //AC                                                  | 118.5                                 | 98.8                                | this work |
